# Supplementary material for: Pro-inflammatory cytokines disrupt β-cell circadian clocks in diabetes
Source: bioRxiv or medRxiv preprint supplement (doi:10.1101/705210), 2019-08-15
Supplement: Supplementary file [file media-2.pdf]

### Clinical characteristics of autopsy pancreas study subjects

|                 | Age (years) | BMI   | Fasting Glucose (mg) |
|-----------------|-------------|-------|----------------------|
| Non-diabetic    | 74±4        | 25±1  | 93±5                 |
| Type 2 diabetic | 75±5        | 36±2* | 188±25*              |

\* $P < 0.05$  denotes statistical significance vs. non-diabetic
