# Supplementary material for: Pro-inflammatory cytokines disrupt β-cell circadian clocks in diabetes
Source: bioRxiv or medRxiv preprint supplement (doi:10.1101/705210), 2019-08-15
Supplement: Supplementary file [file media-3.pdf]

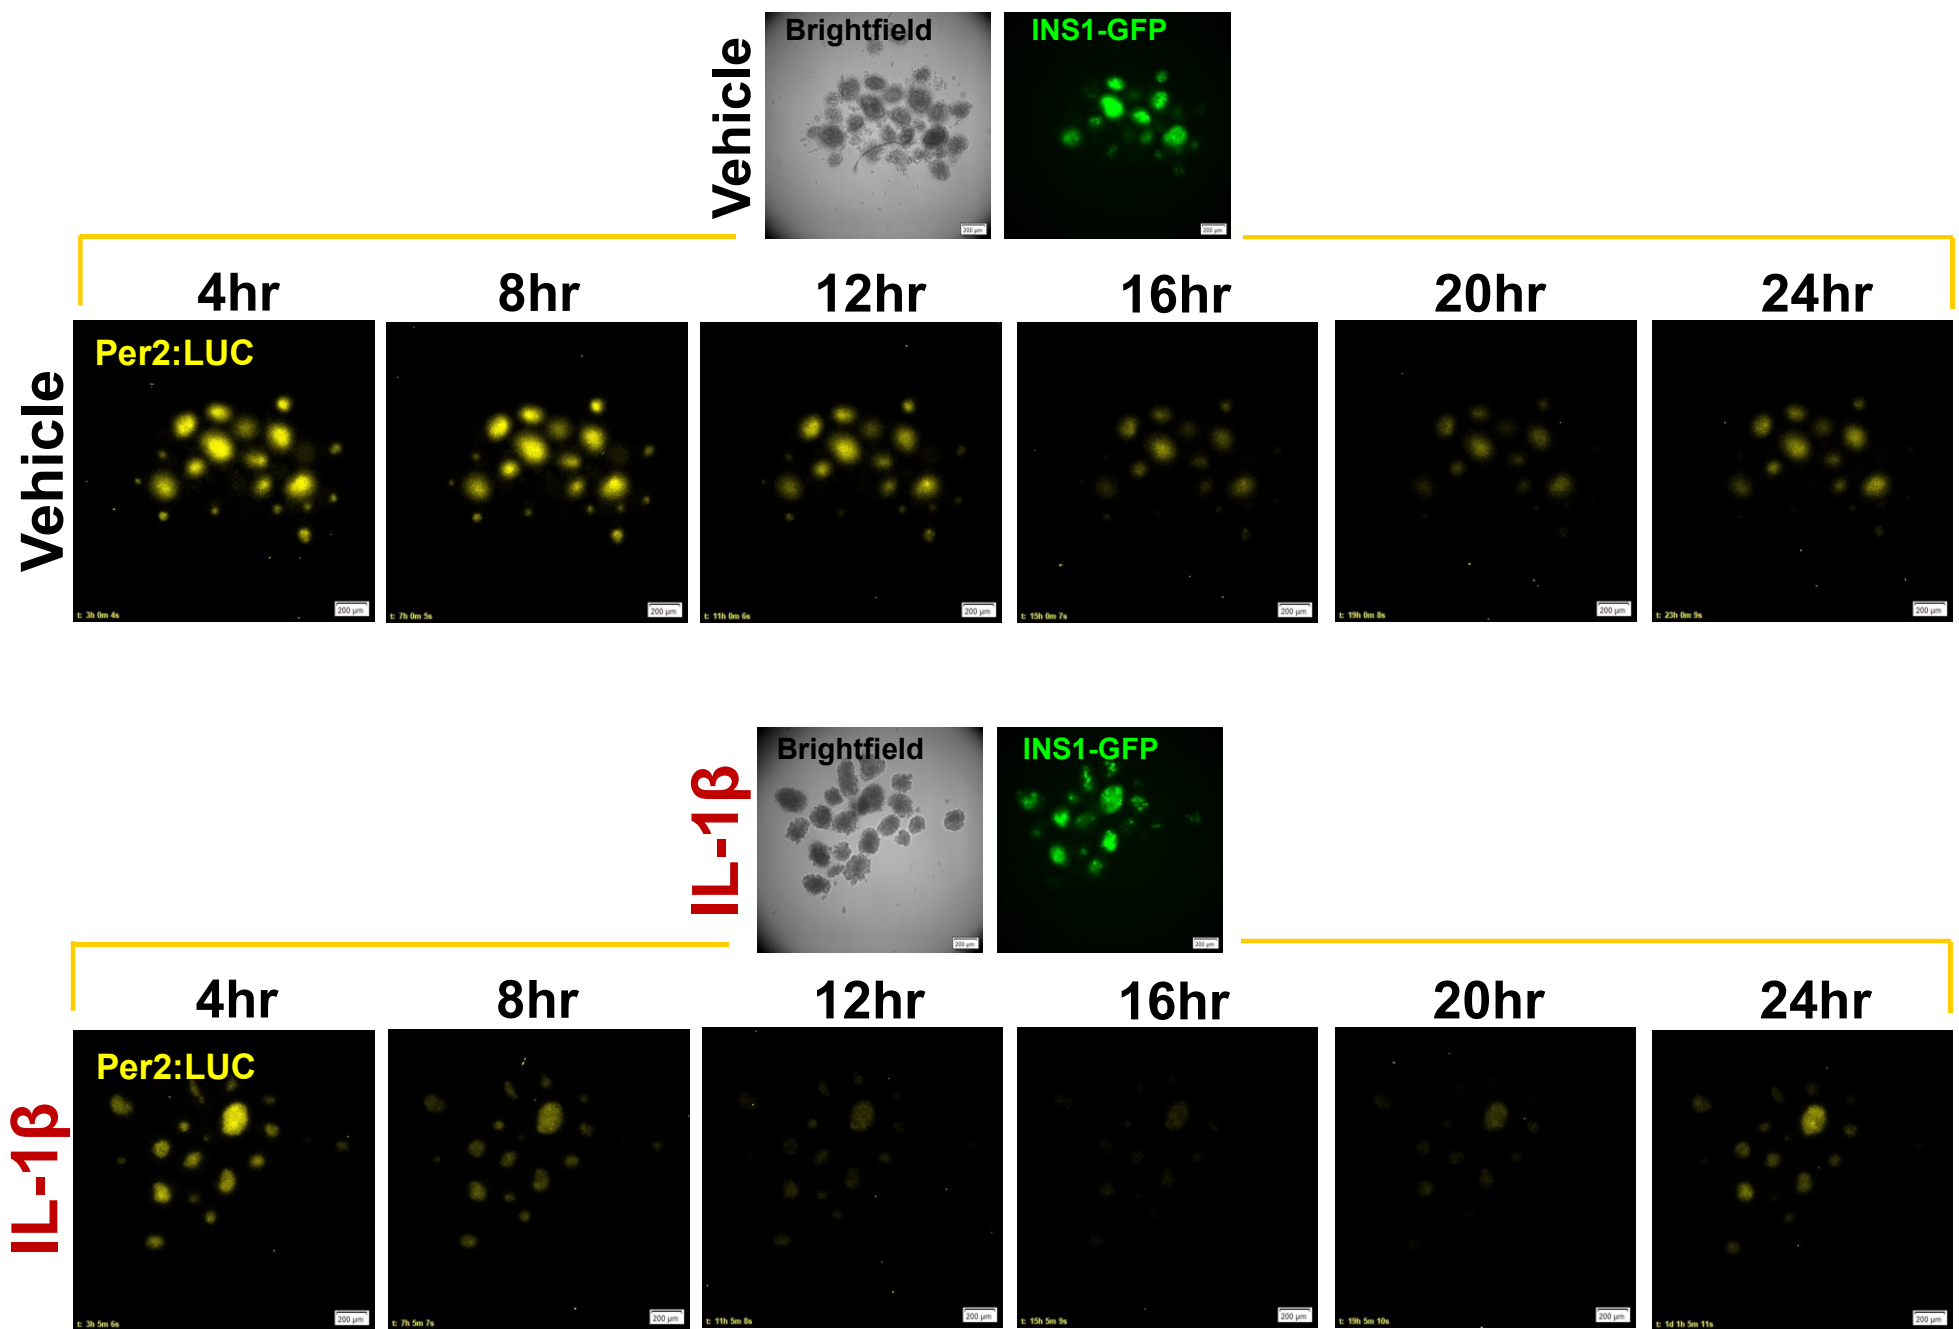

**Supplementary Figure 1.** Representative examples of 24 hours of time-lapse microscopy recordings of circadian *Per2*-driven bioluminescence rhythms in batches of 10-15 islets isolated from *Per2*:LUC-MIP:GFP mice exposed to either vehicle (top) or treated with IL-1 $\beta$  (2 ng/ml) (bottom).
