# Supplementary material for: Pro-inflammatory cytokines disrupt β-cell circadian clocks in diabetes
Source: bioRxiv or medRxiv preprint supplement (doi:10.1101/705210), 2019-08-15
Supplement: Supplementary file [file media-4.pdf]

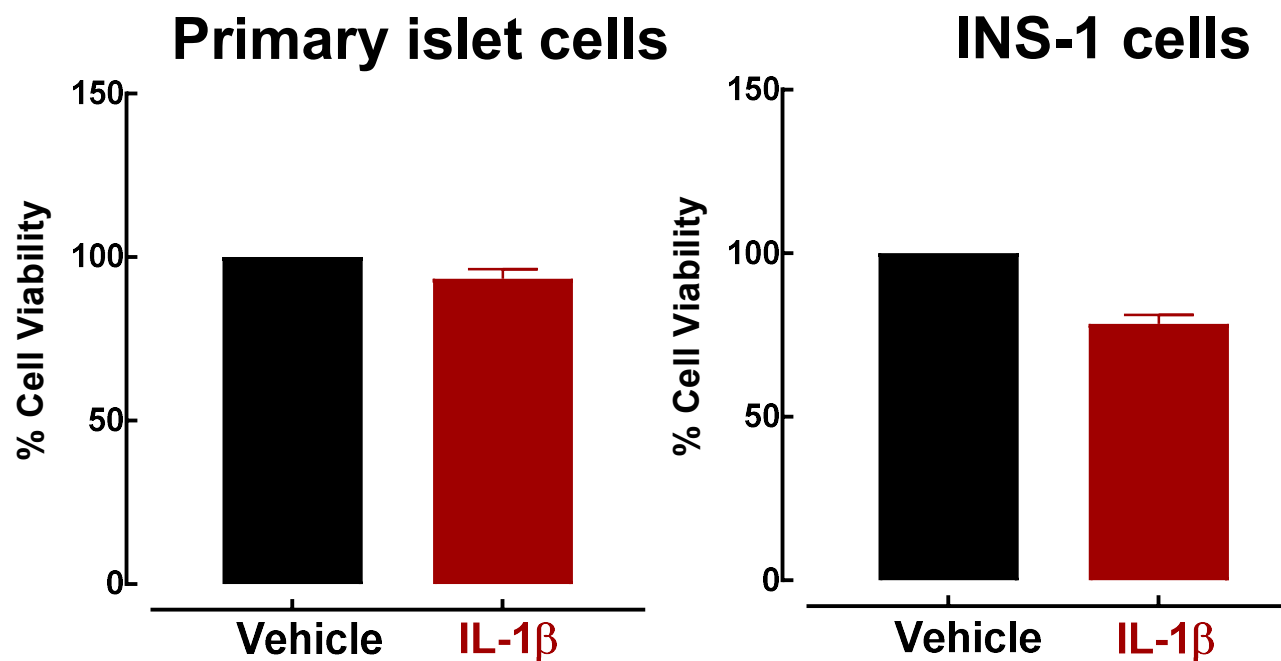

**Supplementary Figure 2. Effects of IL-1 $\beta$  treatment on islet cell viability.** MTT Cell Viability Assay (Cayman Chemicals, Ann Arbor, MI) was performed on dispersed isolated mouse islets (left) and INS-1 832/13  $\beta$ -cells treated with or without IL-1 $\beta$  (0.2 ng/ml) for 24 h. Primary islets were dissociated with TrypLE solution (Life Technologies) and subsequently plated in triplicate for each condition in a 96 well plate. The protocol for MTT assay was followed as per manufacturer instructions.
