# Supplementary material for: Pro-inflammatory cytokines disrupt β-cell circadian clocks in diabetes
Source: bioRxiv or medRxiv preprint supplement (doi:10.1101/705210), 2019-08-15
Supplement: Supplementary file [file media-5.pdf]

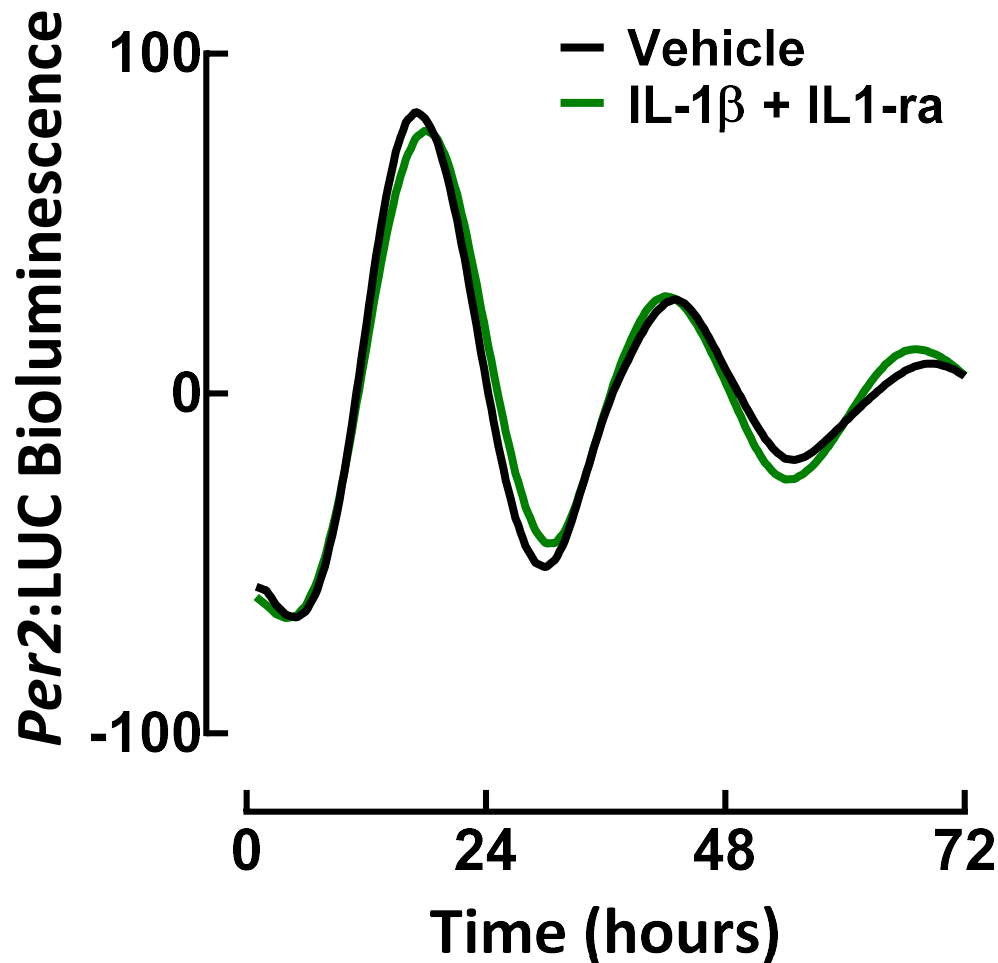

**Supplementary Figure 3. Pretreatment with a specific IL-1 receptor antagonist (IL-1ra) prevents IL-1 $\beta$ -mediated decline in *Per2*-driven bioluminescence in  $\beta$ -cells.** A representative example of circadian *Per2*-driven bioluminescence rhythms in islets isolated from *Per2*:LUC-MIP:GFP mice exposed for 72 hours to either IL-1 $\beta$  (2 ng/ml) + IL-1 receptor antagonist (IL1-ra: 5 $\mu$ g/ml) versus vehicle. Note clear absence of amplitude reduction and phase advance of *Per2*:LUC expression in islets exposed to IL-1 $\beta$  + IL1-ra.
