# Supplementary material for: Pro-inflammatory cytokines disrupt β-cell circadian clocks in diabetes
Source: bioRxiv or medRxiv preprint supplement (doi:10.1101/705210), 2019-08-15
Supplement: Supplementary file [file media-8.pdf]

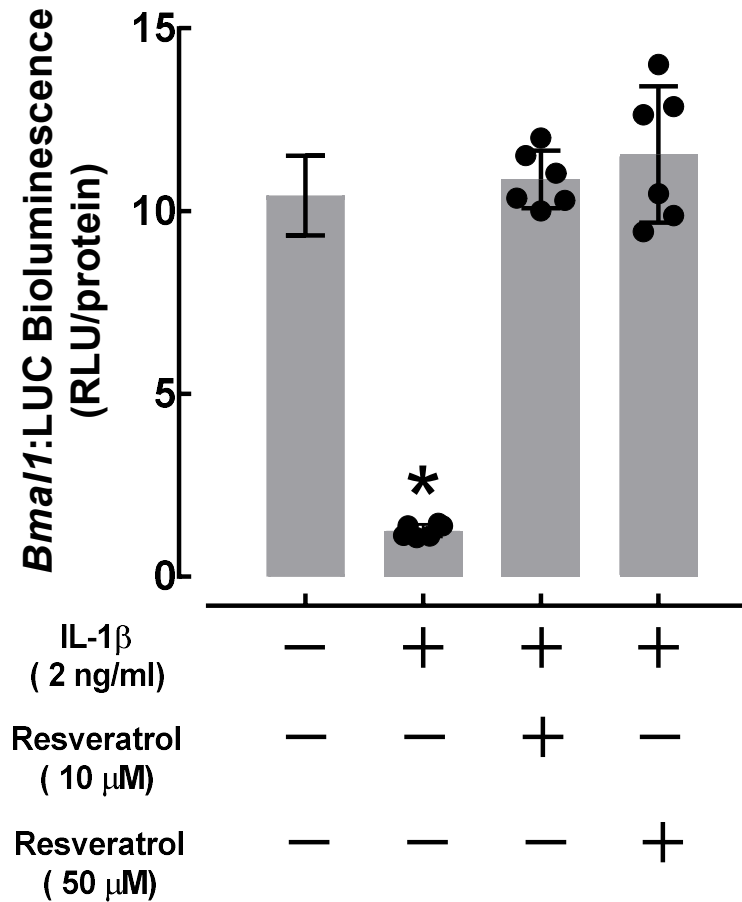

**Supplementary Figure 6. Sirt1 activator Resveratrol reverses deleterious effects of IL-1 $\beta$  on Bmal1 promoter activation.** Bmal1 promoter activity assessed using stable-transfected Bmal1:luciferase (Bmal1:LUC) reporter expressing INS-832/13  $\beta$ -cells exposed for 24 h to IL-1 $\beta$  (0.1-5 ng/ml) with or without co-treatment with Sirt1 chemical agonist Resveratrol (10 and 50 $\mu$ M). Values are mean  $\pm$  SEM ( $n=6$  independent experiments per given condition) and \* $P<0.05$  denotes statistical significance vs. untreated.
