# Supplementary material for: Pro-inflammatory cytokines disrupt β-cell circadian clocks in diabetes
Source: bioRxiv or medRxiv preprint supplement (doi:10.1101/705210), 2019-08-15
Supplement: Supplementary file [file media-10.pdf]

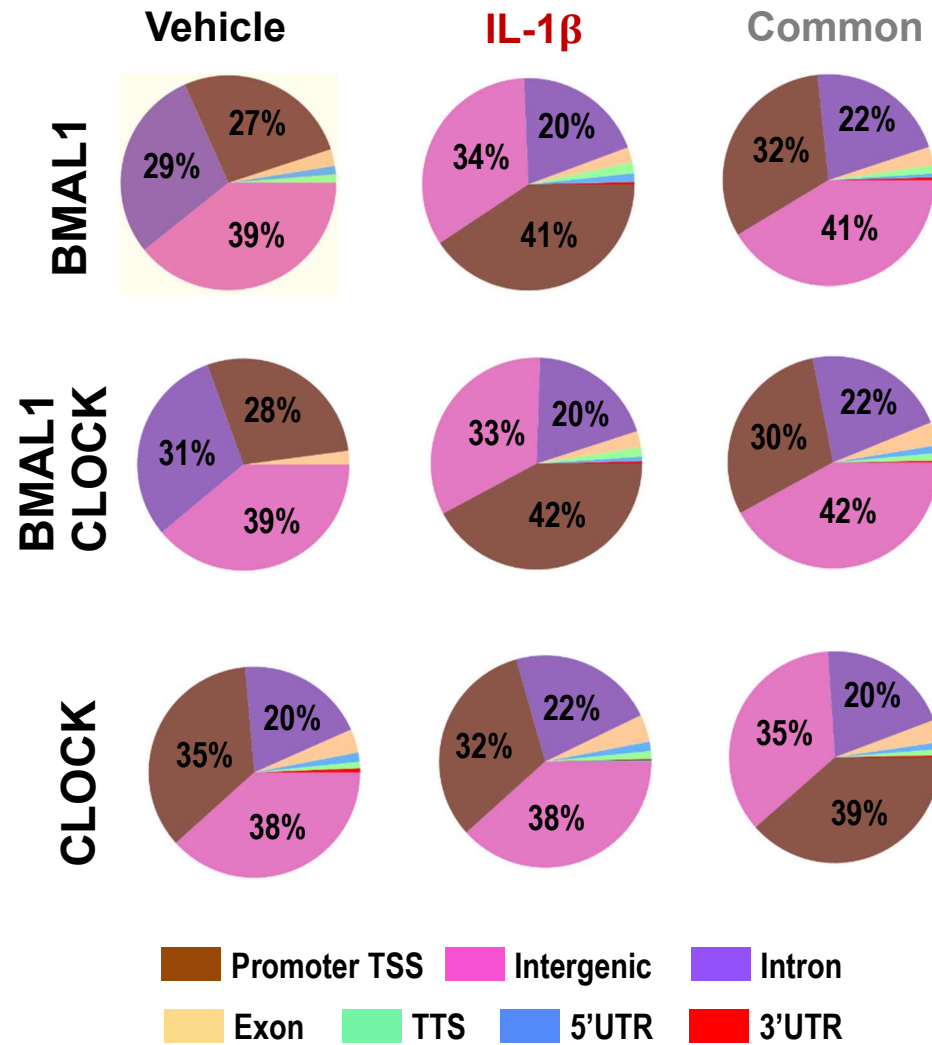

**Supplementary Figure 8. Genome-wide distribution of Bmal1/CLOCK binding peaks.** Global genome-wide distribution of BMAL1, CLOCK and BMAL1/CLOCK cobound binding peaks throughout the genome under vehicle and/or IL-1 $\beta$  conditions.
